# Supplementary material for: Sorghum Drought Tolerance is Associated with Deeper Root System and Decreased Transpiration Rate
Source: Preprints.org preprint supplement (doi:10.20944/preprints202111.0144.v1), 2021-11-08
Supplement: Supplementary file 3 [file supplementary]

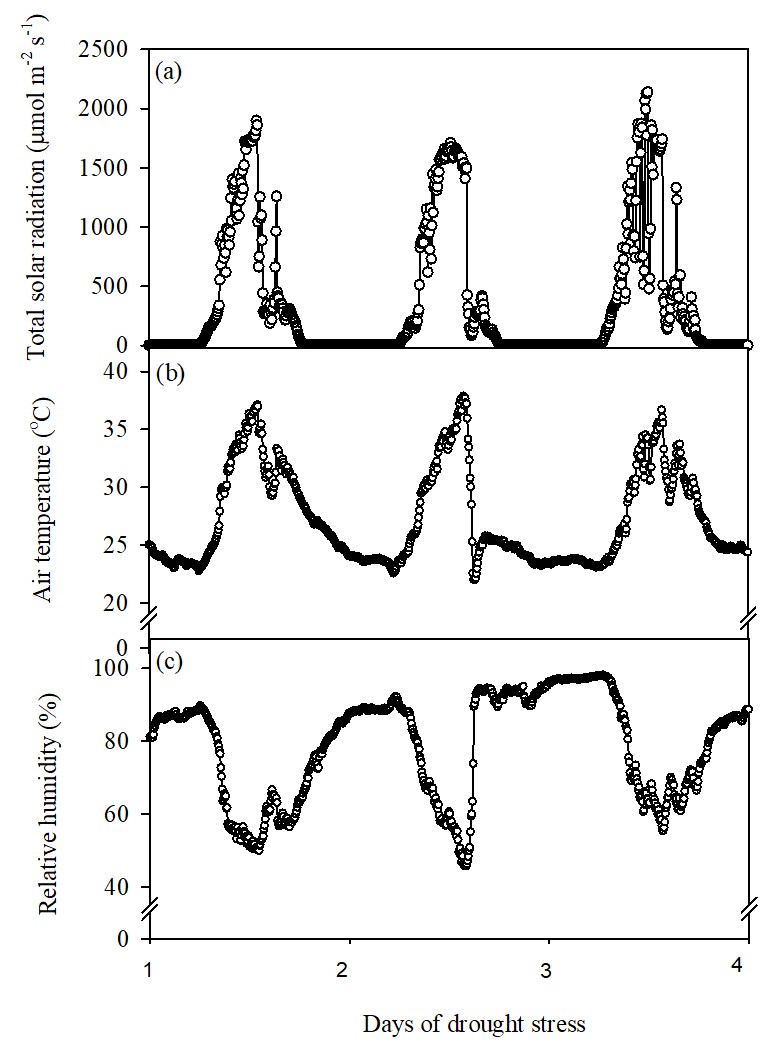


Supplementary figure 1: Weather conditions during root column experiment, showing the variation in (a) total solar radiation (μmol m-2 s-1), (b) air temperature (οC), and (c) relative humidity (%).


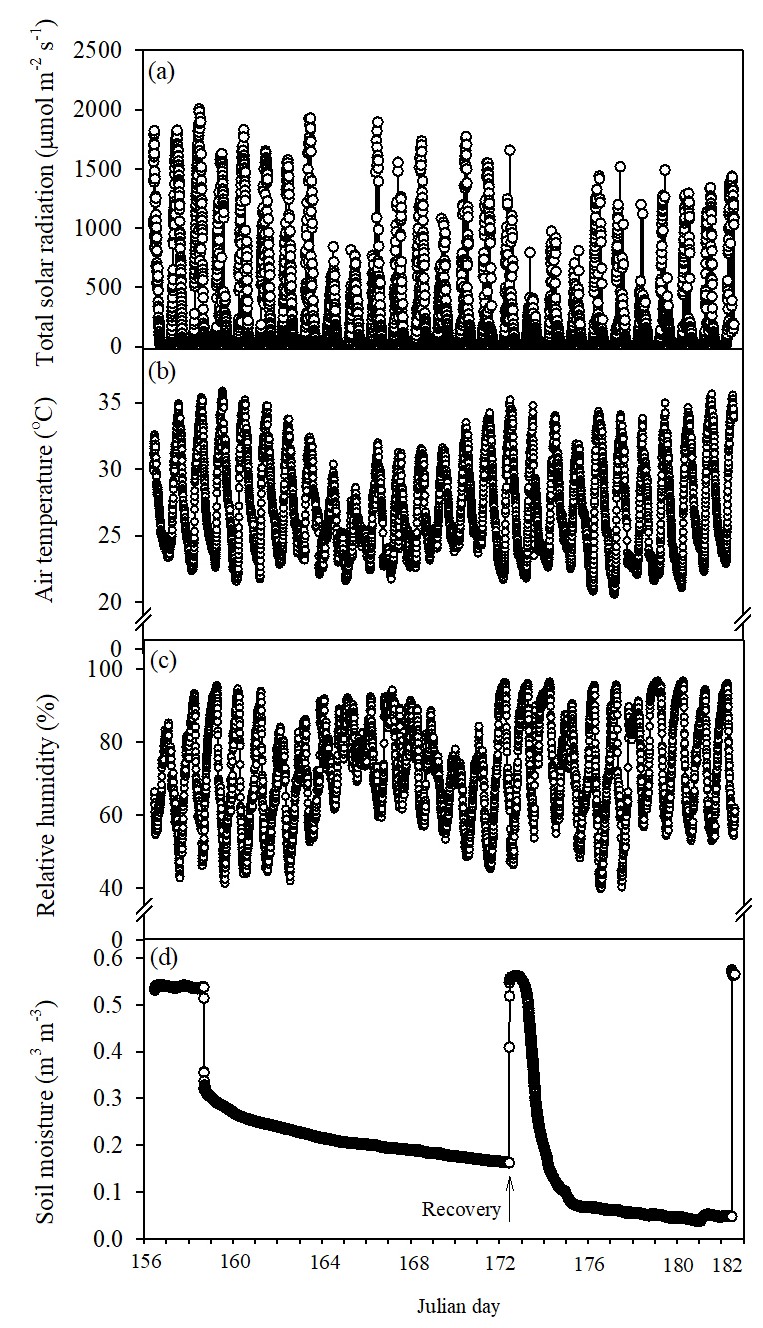


Supplementary figure 2: Weather conditions prevailed during the field experiment, indicating variation in (a) total solar radiation (μmol m-2 s-1), (b) air temperature (οC), (c) relative humidity (%), and (d) soil moisture (m3 m-3)
